# Supplementary material for: Horizontal gene transfer of a chloroplast DnaJ-Fer protein to Thaumarchaeota and the evolutionary history of the DnaK chaperone system in Archaea
Source: PubMed Central journal article supplement (PMC3564930; doi:10.1186/1471-2148-12-226), 2012-11-26
Supplement: 1471-2148-12-226-S2.pdf [file 1471-2148-12-226-S2.pdf]

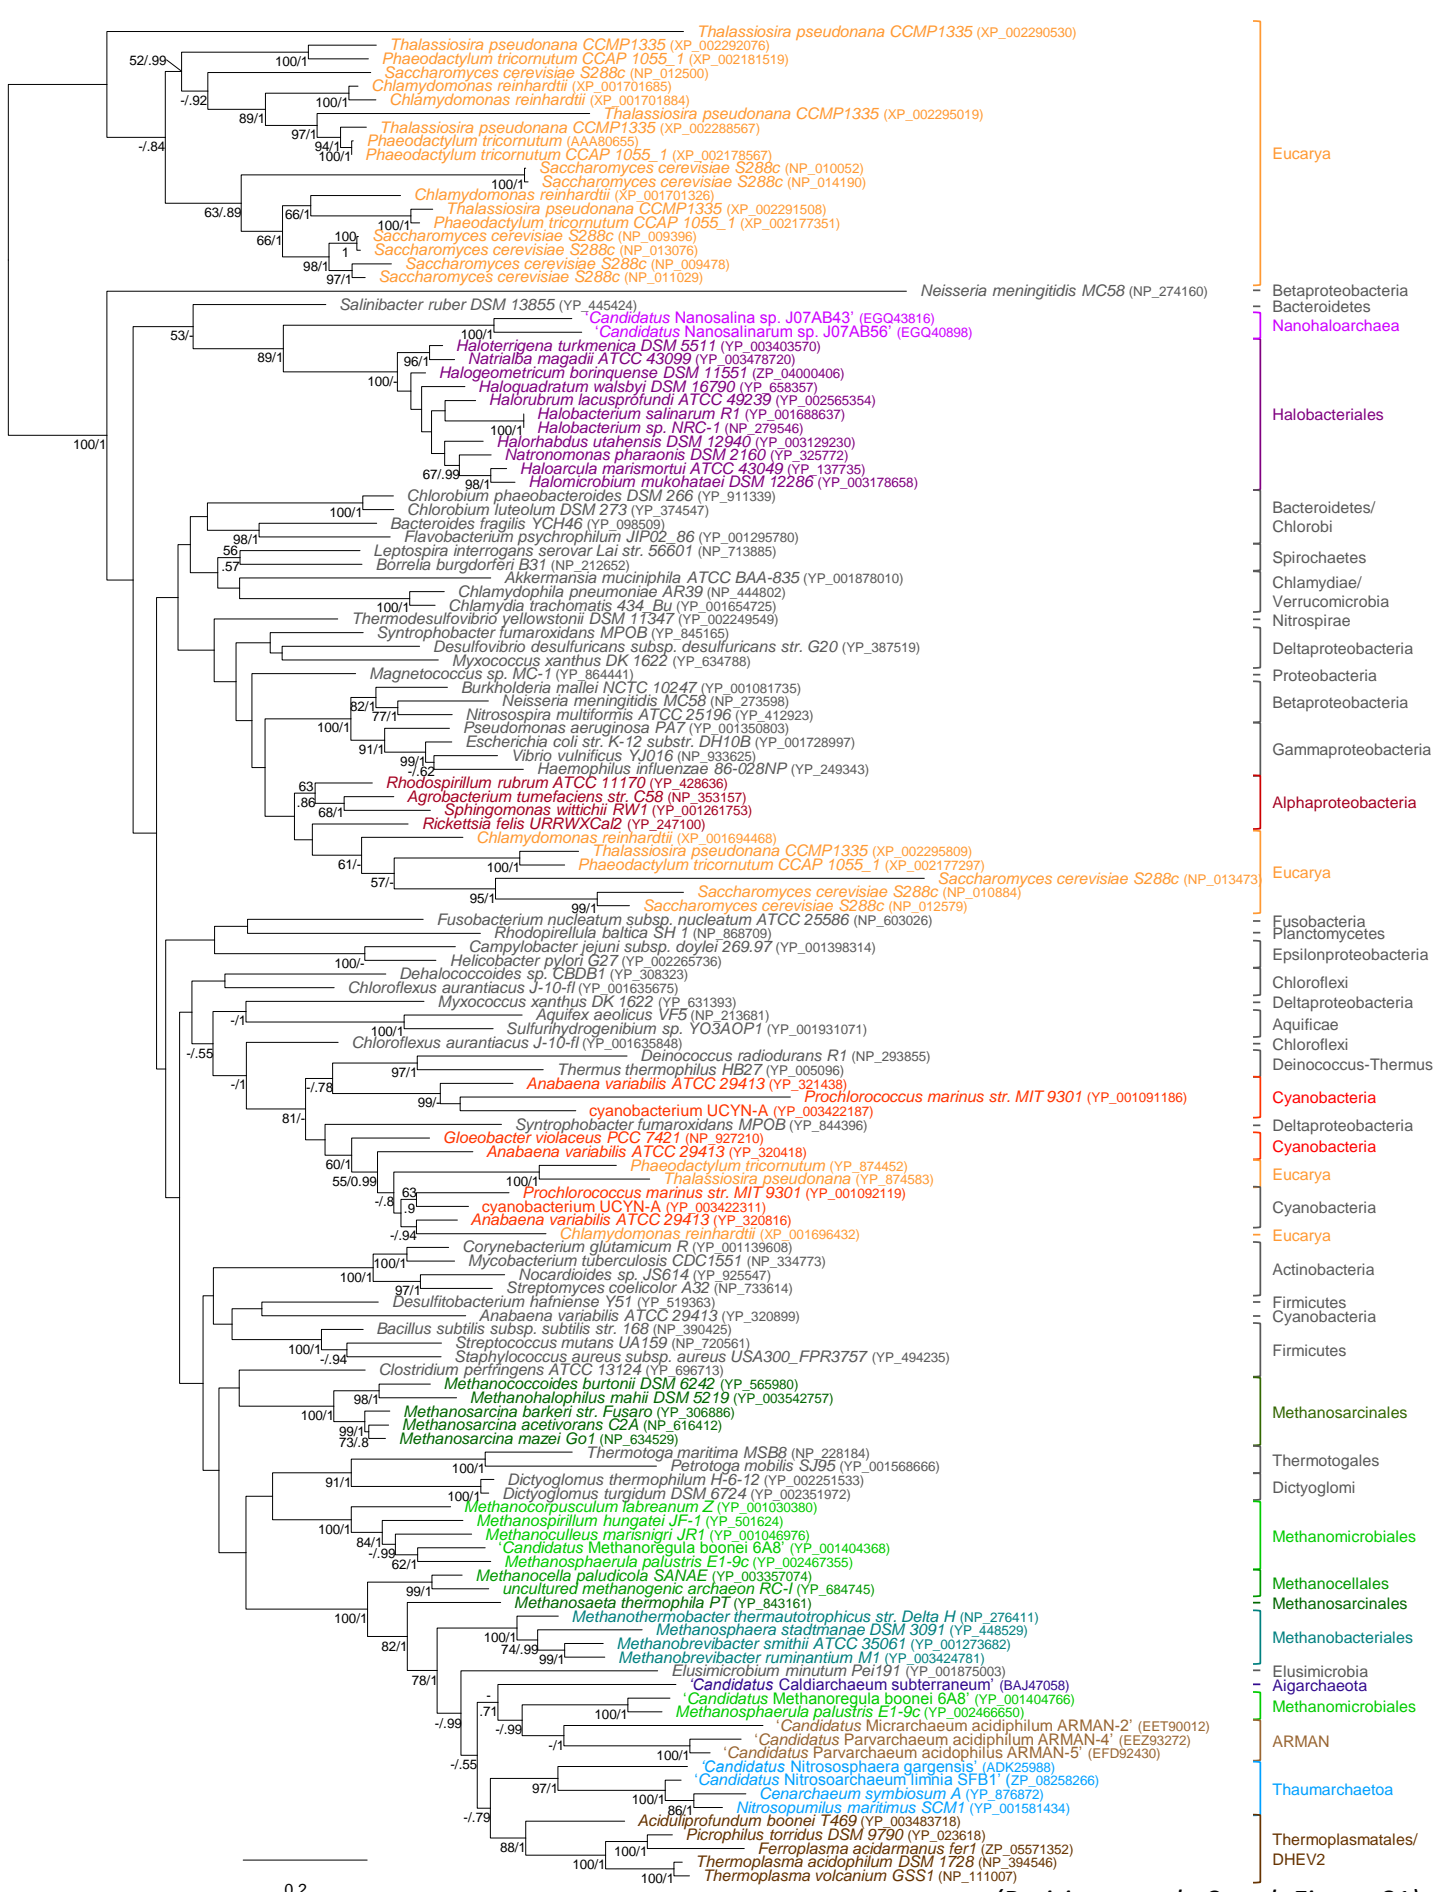

(Petitjean et al., Suppl. Figure S1)
